# Supplementary material
Source: publisher figshare collection journal article supplement (https://tandf.figshare.com/articles/dataset/_/5432749)
Supplement: Supplementary file 1 [file 1]

Supplementary Table 1 Primers for site-directed mutagenesis in this study

| Primers  | Sequence 5'-3'                         | Substitution | Codon change |
|----------|----------------------------------------|--------------|--------------|
| E2A_F    | CCTGCAGCCATGG <u>C</u> ATTCCGGCAGC     | Glu2Ala      | GAA → GCA    |
| E2A_Rev  | None                                   |              |              |
| R4A_F    | CTGCAGCCATGGAATTCG <u>C</u> GCAGCTCAAG | Arg4Ala      | CGG → GCG    |
| R4A_Rev  | None                                   |              |              |
| K7A_F    | CCGGCAGCTCG <u>C</u> GTATTTCATCGC      | Lys7Ala      | AAG → GCG    |
| K7A_Rev  | GCGATGAAATACG <u>C</u> GCAGCTGCCGG     |              |              |
| N17A_F   | CGGAAGCAGGGG <u>C</u> GCATGGCTGCAGC    | Asn17Ala     | AAC → GCG    |
| N17A_Rev | GCTGCAGCCATC <u>G</u> CCCCCTGCTTCCG    |              |              |
| K23A_F   | CTGCAGCAGCCG <u>C</u> GCGCCTGCACG      | Lys23Ala     | AAG → GCG    |
| K23A_Rev | GACGTGCAGGCG <u>C</u> GGCTGCTGCAGC     |              |              |
| K23G_F   | GCTGCAGCAGCCG <u>G</u> GCCTGCACG       | Lys23Gly     | AAG → GGG    |
| K23G_Rev | CGTGCAGGCGC <u>C</u> GGCTGCTGCAGC      |              |              |
| K23Q_F   | GCTGCAGCAGCC <u>A</u> GCCTGCACG        | Lys23Gln     | AAG → CAG    |
| K23Q_Rev | CGTGCAGGCGC <u>T</u> GGCTGCTGCAGC      |              |              |
| K23R_F   | GCTGCAGCAGCC <u>A</u> GGCGCCTGCACG     | Lys23Arg     | AAG → AGG    |
| K23R_Rev | CGTGCAGGCGC <u>C</u> TGGCTGCTGCAGC     |              |              |
| K23V_F   | GCTGCAGCAGCCG <u>T</u> GCCTGCACG       | Lys23Val     | AAG → GTG    |
| K23V_Rev | CGTGCAGGCGC <u>A</u> CGGCTGCTGCAGC     |              |              |
| H26A_F   | GCCAAGCGCCTGG <u>C</u> CGTCTCACAGCCC   | His26Ala     | CAC → GCC    |
| H26A_Rev | GGGCTGTGAGACG <u>G</u> CCAGGCGCTTGGC   |              |              |
| V27A_F   | AGCGCCTGCACG <u>C</u> CTCACAGCCCCC     | Val27Ala     | GTC → GCC    |
| V27A_Rev | GGGGGCTGTGAGG <u>C</u> GTGCAGGCGCT     |              |              |
| S28A_F   | CTGCACGTCG <u>C</u> ACAGCCCCCATC       | Ser28Ala     | TCA → GCA    |
| S28A_Rev | ATGGGGGGGCTGTG <u>C</u> GACGTGCAGGCG   |              |              |
| Q29A_F   | ACGTCTCAGC <u>G</u> CCCCCATCACG        | Gln29Ala     | CAG → GCG    |
| Q29A_Rev | GATGGGGGGG <u>C</u> GCTGAGACGTGC       |              |              |
| Q29C_F   | TGCACGTCTCATG <u>T</u> CCCCCATCAC      | Gln29Cys     | CAG → TGT    |
| Q29C_Rev | GTGATGGGGGGG <u>A</u> CATGAGACGTGCA    |              |              |
| Q29D_F   | TGCACGTCTCAG <u>A</u> CCCCCATCAC       | Gln29Asp     | CAG → GAC    |
| Q29D_Rev | GTGATGGGGGGG <u>T</u> CTGAGACGTGCA     |              |              |
| Q29E_F   | GCACGTCTCAG <u>A</u> CCCCCATCACG       | Gln29Glu     | CAG → GAG    |
| Q29E_Rev | CGTGATGGGGGGG <u>C</u> TCTGAGACGTGC    |              |              |
| Q29F_F   | GCACGTCTCAT <u>T</u> TCCCCCATCACG      | Gln29Phe     | CAG → TTT    |
| Q29F_Rev | CGTGATGGGGGGG <u>A</u> ATGAGACGTGC     |              |              |
| Q29G_F   | TGCACGTCTCAG <u>G</u> CCCCCATCAC       | Gln29Gly     | CAG → GGA    |
| Q29G_Rev | GTGATGGGGGGG <u>T</u> CCTGAGACGTGCA    |              |              |
| Q29H_F   | GCACGTCTCA <u>A</u> CCCCCATCACG        | Gln29His     | CAG → CAC    |
| Q29H_Rev | CGCGTGATGGGGGGG <u>T</u> GTGAGACGTGC   |              |              |
| Q29I_F   | TGCACGTCTCA <u>A</u> TACCCCCATCAC      | Gln29Ile     | CAG → ATA    |
| Q29I_Rev | GTGATGGGGGGG <u>T</u> ATTGAGACGTGCA    |              |              |

| Primers  | Sequence 5'-3'                        | Substitution | Codon change |
|----------|---------------------------------------|--------------|--------------|
| Q29K_F   | GCACGTCTCAA <u>AAG</u> CCCCCATCACGCG  | Gln29Lys     | CAG → AAG    |
| Q29K_Rev | CGCGTGATGGGGGGG <u>CTT</u> TGAGACGTGC |              |              |
| Q29L_F   | GCACGTCTCA <u>CTG</u> CCCCCATCACGCG   | Gln29Leu     | CAG → CTG    |
| Q29L_Rev | CGCGTGATGGGGGGG <u>CAG</u> TGAGACGTGC |              |              |
| Q29M_F   | TGCACGTCTCA <u>ATG</u> CCCCCATCAC     | Gln29Met     | CAG → ATG    |
| Q29M_Rev | GTGATGGGGGGG <u>CAT</u> TGAGACGTGCA   |              |              |
| Q29N_F   | GCACGTCTCAA <u>AAC</u> CCCCCATCACG    | Gln29Asn     | CAG → AAC    |
| Q29N_Rev | CGTGATGGGGGGG <u>GTT</u> TGAGACGTGC   |              |              |
| Q29P_F   | GCACGTCTCA <u>CCG</u> CCCCCATCACGCG   | Gln29Pro     | CAG → CCG    |
| Q29P_Rev | CGCGTGATGGGGGGG <u>CGG</u> TGAGACGTGC |              |              |
| Q29R_F   | TGCACGTCTCA <u>CGA</u> CCCCCATCAC     | Gln29Arg     | CAG → CGA    |
| Q29R_Rev | GTGATGGGGGGT <u>TCG</u> TGAGACGTGCA   |              |              |
| Q29S_F   | GCACGTCTCA <u>TCG</u> CCCCCATCACG     | Gln29Ser     | CAG → TCG    |
| Q29S_Rev | CGTGATGGGGGGG <u>CGA</u> TGAGACGTGC   |              |              |
| Q29T_F   | TGCACGTCTCA <u>ACG</u> CCCCCATCAC     | Gln29Thr     | CAG → ACG    |
| Q29T_Rev | GTGATGGGGGGG <u>CGT</u> TGAGACGTGCA   |              |              |
| Q29V_F   | TGCACGTCTCA <u>GTG</u> CCCCCATCAC     | Gln29Val     | CAG → GTG    |
| Q29V_Rev | GTGATGGGGGGG <u>CACT</u> GAGACGTGCA   |              |              |
| Q29W_F   | TGCACGTCTCA <u>TGG</u> CCCCCATCAC     | Gln29Trp     | CAG → TGG    |
| Q29W_Rev | GTGATGGGGGGG <u>CCAT</u> GAGACGTGCA   |              |              |
| Q29Y_F   | TGCACGTCTCA <u>TAC</u> CCCCCATCAC     | Gln29Tyr     | CAG → TAC    |
| Q29Y_Rev | GTGATGGGGGGG <u>TAT</u> GAGACGTGCA    |              |              |
| P30A_F   | CGTCTCACAGG <u>CCC</u> CCATCACGC      | Pro30Ala     | CCC → GCC    |
| P30A_Rev | GCGTGATGGGGGG <u>CCT</u> GTGAGACG     |              |              |
| T33A_F   | AGCCCCCATC <u>GCG</u> GCGGAGATGC      | Thr33Ala     | ACG → GCG    |
| T33A_Rev | GCATCTGCCG <u>GCG</u> GATGGGGGGC      |              |              |
| R34A_F   | CCATCACGG <u>GCG</u> CAGATGCAAGCC     | Arg34Ala     | CGG → GCG    |
| R34A_Rev | GCTTGCATCTG <u>GCG</u> CGTGATGGG      |              |              |
| Q37A_F   | GCGGCAGATGG <u>CAG</u> CCCTGGAAGC     | Gln37Ala     | CAA → GCA    |
| Q37A_Rev | GCTTCCAGGGCT <u>TGCC</u> ATCTGCCGC    |              |              |
| E40A_F   | GCAAGCCCTGG <u>CAG</u> CGGACTTGG      | Glu40Ala     | GAA → GCA    |
| E40A_Rev | CCAAGTCCGCT <u>TGCC</u> AGGGCTTGC     |              |              |
| D42A_F   | CCTGGAAGCGG <u>CCT</u> TGGGCGTCG      | Asp42Ala     | GAC → GCC    |
| D42A_Rev | CGACGCCCAAGG <u>CCG</u> CTTCCAGG      |              |              |
| R50A_F   | GCTTCTGGAGG <u>GCA</u> AGCCACCGCG     | Arg50Ala     | CGA → GCA    |
| R50A_Rev | CGCGGTGGCT <u>TGCC</u> TCCAGAAGC      |              |              |
| H52A_F   | GGAGCGAAGCG <u>CCC</u> GCGGGATCG      | His52Ala     | CAC → GCC    |
| H52A_Rev | CGATCCCGCGG <u>GCG</u> GCTTCGCTCC     |              |              |
| F98A_F   | AGCGTGGCGTATG <u>CCG</u> GGAACGCCCATC | Phe98Ala     | TTC → GCC    |
| F98A_Rev | GATGGGCGTTCCG <u>GCA</u> TACGCCACGCT  |              |              |

| Primers   | Sequence 5'-3'                         | Substitution | Codon change |
|-----------|----------------------------------------|--------------|--------------|
| T100A_F   | GCGTATTTTCGGAG <u>GCG</u> CCCATCTACCGC | Thr100Ala    | ACG → GCG    |
| T100A_Rev | GCGGTAGATGGG <u>GCT</u> CCGAAATACGC    |              |              |
| K129A_F   | ACGCACATGACCG <u>GCG</u> GACGAGCAGGTG  | Lys129Ala    | AAG → GCG    |
| K129A_Rev | CACCTGCTCGT <u>CCG</u> CGGTCATGTGCGT   |              |              |
| R147A_F   | GTGGGCTTCAGCG <u>CCT</u> TCTTTCCCCGG   | Arg147Ala    | CGC → GCC    |
| R147A_Rev | CCGGGGAAAGAAG <u>GCG</u> GCTGAAGCCCAC  |              |              |
| R199A_F   | CCGCGCGGCGGC <u>GCG</u> CCGAGCTTCGCC   | Arg199Ala    | CGG → GCG    |
| R199A_Rev | GGCGAAGCTCGG <u>GCG</u> CGCCGCCGCGCGG  |              |              |
| F202A_F   | GGCCGGCCGAGCG <u>CCG</u> CCGATGAGGTG   | Phe202Ala    | TTC → GCC    |
| F202A_Rev | CACCTCATCGGCG <u>GCG</u> GCTCGGCCGGCC  |              |              |
| V246A_F   | GTCCCTGCGTCTG <u>CCG</u> CAGCGATCCGT   | Val246Ala    | GTC → GCC    |
| V246A_Rev | ACGGATCGCTGCG <u>GCA</u> GACGCAGGGAC   |              |              |
| P267A_F   | CGGGTCAAGGTG <u>GCC</u> ATCAGCTGCATC   | Pro267Ala    | CCC → GCC    |
| P267A_Rev | GATGCAGCTGATG <u>GCC</u> ACCTTGACCCG   |              |              |

Notes: The replaced codon was underlined.

Supplementary Table 2 Binding ratios of wild-type CbnR and Gln29 mutants to the *cbnA* promoter

| Substitution | Concentration of CbnR protein (nM) |                |                |                 |     |
|--------------|------------------------------------|----------------|----------------|-----------------|-----|
|              | 0                                  | 39.0           | 97.5           | 195             | 390 |
| Wild type    | 0                                  | 0              | $4.77 \pm 1.9$ | $34.2 \pm 6.9$  | 100 |
| Gln29Ala     | 0                                  | $20.5 \pm 7.2$ | $59.2 \pm 2.4$ | 100             | 100 |
| Gln29Gly     | 0                                  | $14.0 \pm 1.7$ | $38.6 \pm 6.7$ | 100             | 100 |
| Gln29Ser     | 0                                  | $6.37 \pm 2.4$ | $26.1 \pm 2.4$ | $80.8 \pm 5.6$  | 100 |
| Gln29Thr     | 0                                  | $8.20 \pm 1.3$ | $24.4 \pm 3.5$ | $87.7 \pm 11.1$ | 100 |

Notes: See Materials and Methods for details.
